# Supplementary material for: Additivity of the genetic load revealed to be a product of both synergistic and antagonistic epistasis in Drosophila.
Source: Research Square preprint supplement (doi:10.21203/rs.3.rs-7910627/v1), 2025-11-14
Supplement: Supplementary file 1 [file b5d8584e96e2253a64a6e407.xlsx]

## Sheet: Sheet1
Table 1.
Trait	Model	AICc	BIC	Log-Lik	Pr(>Chisq)
No. of Sublines Surviving	Linear	649.475	658.883	-321.67	1.931e-05 ***
	Quadratic	633.313	645.808	-312.54
Pupal Productivity	Linear	1084.04	1099.28	-539.01	0.01361 *
	Quadratic	1079.97	1100.28	-535.97
Pupa-to-adult Viability	Linear	-691.971	-676.733	-783.28	4.339e-06 ***
	Quadratic	-715.076	-694.766	-772.72
Adult Progeny	Linear	951.35	966.587	-472.66	0.7903
Eclosed	Quadratic	953.293	973.602	-472.63
